# Supplementary material
Source: MDPI journal article supplement (https://www.mdpi.com/2076-3263/11/4/162)
Supplement: s1 [file s1]

## Sheet: Hoja1
	Fossil site	Number in Figure 2	Age	Stratigraphic unit	Taxa	References	Comments
	172-i/04/a	25	C29r	Lower Red Garumnian	Hadrosauridae indet. Hadrosauropodus sp.	Vila et al., 2013 Puértolas-Pascual et al., 2018	Denominated 'Serraduy Sur' in Vila et al., 2013
	172-i/04/b	31	C29r	Lower Red Garumnian	Dinosauria indet.	Puértolas-Pascual et al., 2018
	172-i/04/c	20	C29r	Grey Garumnian	Dinosauria indet.	Puértolas-Pascual et al., 2018
	172-i/04/d	19	C29r	Grey Garumnian	Dinosauria indet.	Cruzado-Caballero et al., 2012 Puértolas-Pascual et al., 2012 Puértolas-Pascual et al., 2018
	172-i/04/e	21	C29r	Grey Garumnian	Hadrosauridae indet. Theropoda indet. cf. Arcovenator	Cruzado-Caballero et al., 2012 Puértolas-Pascual et al., 2012 Puértolas-Pascual et al., 2018
	172-i/04/f	23	C29r	Lower Red Garumnian	Hadrosauridae indet.	Cruzado-Caballero et al., 2012 Puértolas-Pascual et al., 2012 Puértolas-Pascual et al., 2018
	Amor 1	32	C29r	Lower Red Garumnian	Dinosauria indet. Hadrosauridae indet. Bothremydidae indet.	Cruzado-Caballero et al., 2012 Puértolas-Pascual et al., 2012 Company et al., 2015 Puértolas-Pascual et al., 2018
	Amor 2	35	C29r	Lower Red Garumnian	Hadrosauridae indet. Bothremydidae indet.	Cruzado-Caballero et al., 2012 Puértolas-Pascual et al., 2012 Puértolas-Pascual et al., 2018
	Amor 3	36	C29r	Lower Red Garumnian	Dinosauria indet. Hadrosauridae indet. Bothremydidae indet. Agaresuchus subjuniperus	Cruzado-Caballero et al., 2012 Puértolas-Pascual et al., 2012 Puértolas-Pascual et al., 2014 Puértolas-Pascual et al., 2018
	Areny 1	51	C30n	Grey Garumnian	Hadrosauropodus sp.	Barco et al., 2001
	Barranco Extremadura	11	C29r	Aren Fm	Dinosauria indet. Hadrosauridae indet. Bothremydidae indet. cf. Thoracosaurus	Puértolas-Pascual et al. 2018 Blanco et al., 2020
	Barranco Serraduy 1	17	C29r	Grey Garumnian	Dinosauria indet. Hadrosauridae indet.	Cruzado-Caballero et al., 2012 Puértolas-Pascual et al., 2012 Puértolas-Pascual et al., 2018
	Barranco Serraduy 2	22	C29r	Lower Red Garumnian	Dinosauria indet. Hadrosauridae indet.	Cruzado-Caballero et al., 2012 Puértolas-Pascual et al., 2012 Company et al., 2015 Puértolas-Pascual et al., 2018
	Barranco Serraduy 3	24	C29r	Lower Red Garumnian	Vertebrata indet.	Puértolas-Pascual et al., 2018
	Barranco Serraduy 4	33	C29r	Lower Red Garumnian	Dinosauria indet. Hadrosauridae indet. Sauropoda indet. Bothremydidae indet. Eusuchia indet.	Cruzado-Caballero et al., 2012 Puértolas-Pascual et al., 2012 Company et al., 2015 Puértolas-Pascual et al., 2016 Puértolas-Pascual et al., 2018
	Barranco Serraduy 5	34	C29r	Lower Red Garumnian	Hadrosauridae indet. Bothremydidae indet.	Cruzado-Caballero et al., 2012 Puértolas-Pascual et al., 2012 Puértolas-Pascual et al., 2018
	Beranuy	18	C29r	Grey Garumnian	Crocodylomorpha swim tracks	Pérez-Pueyo et al. 2018
	Blasi 1	50	C30n	Arén Fm (top)	Hadrosauridae indet. Euhadrosauria indet. Blasisaurus canudoi Theropoda indet. cf. Arcovenator cf. Allodaposuchus cf.Thoracosaurus	López-Martínez et al., 2001 Cruzado-Caballero et al., 2009 Cruzado-Caballero et al., 2010a Cruzado-Caballero et al., 2010c Torices et al., 2015 Puértolas-Pascual et al., 2016	López-Martínez et al., 2001 also mention a Blasi 1B site
	Blasi 2a &2b	52	C30n	Grey Garumnian	Hadrosauridae indet. Euhadrosauria indet. Theropoda indet. cf. Arcovenator Coelurosauria indet. Dromaeosauridae indet. cf. Richardoestesia cf. Paronychodon Mesoeucrocodylia indet. Eusuchia indet. Allodaposuchidae indet. cf. Allodaposuchus aff. Acynodon trematochampsid-like teeth Bothremydidae indet. Solemydidae sp. Albanerpeton aff. nexuosum Discoglossidae aff. Paradiscoglossus Palaeobatrachidae …	López-Martinez et al., 1999 López-Martínez et al., 2001 Murelaga & Canudo, 2005 Blain et al., 2010 Moreno-Azanza et al., 2013 Torices et al., 2015 Puértolas-Pascual et al., 2016 Blanco et al., 2020 Pérez-Pueyo et al., in press
	Blasi 3	53	C30n	Grey Garumnian	Hadrosauridae indet. Lambeosaurinae indet. Arenysaurus ardevoli Theropoda indet. cf. Arcovenator Eusuchia indet. cf. Allodaposuchus trematochampsid-like teeth Bothremydidae indet.	López-Martínez et al., 2001 Canudo et al., 2005 Cruzado-Caballero et al., 2005 Murelaga & Canudo, 2005 Cruzado-Caballero et al., 2009 Pereda-Suberbiola et al., 2009 Cruzado-Caballero et al., 2013 Cruzado-Caballero et al., 2015 Torices et al., 2015 Puértolas-Pascual et al., 2016	Cruzado-Caballero et al., 2013 also mention a Blasi 3,4 site
	Blasi 3,4	54	C30n-C29r	Lower Red Garumnian	Euhadrosauridae indet.	Cruzado-Caballero et al., 2013 Cruzado Caballero et al., 2014
	Blasi 4	56	C30n-C29r	Lower Red Garumnian	Hadrosauridae indet. Lambeosaurinae indet. Eusuchia indet. Bothremydidae indet.	López-Martínez et al., 2001 Murelaga & Canudo, 2005 Cruzado-Caballero et al., 2010c Puértolas-Pascual et al., 2016
	Blasi 5	57	C30n-C29r	Lower Red Garumnian	Hadrosauridae indet. Hadrosaurinae indet. Pterosauria indet. Eusuchia indet. Bothremydidae indet.	López-Martínez et al., 2001 Murelaga & Canudo, 2005 Cruzado-Caballero et al., 2010c Puértolas-Pascual et al., 2016
	Camino Fornons 1	38	C29r	Grey Garumnian	Dinosauria indet. Hadrosauridae indet. Theropoda? indet. Sauropoda? indet. Osteichthyes indet. Bothremydidae indet.	Puértolas-Pascual et al., 2018
	Camino Fornons 2	39	C29r	Grey Garumnian	Hadrosauridae indet. Allodaposuchidae indet. cf. Thoracosaurus	Puértolas-Pascual et al., 2018 Blanco et al., 2020
	Camino Rin 1	13	C29r	Lower Red Garumnian	Theropoda? indet.	Puértolas-Pascual et al., 2018
	Camino Rin 2	14	C29r	Lower Red Garumnian	Hadrosauridae indet. Theropoda? indet. Pterosauria? indet.	Puértolas-Pascual et al., 2018
	Campo 1	1	C29r	Grey Garumnian	Hadrosauropodus sp.	Canudo et al. 2016
	Campo 2	2	C29r	Lower Red Garumnian	Crocodylomorpha swim tracks	Canudo et al. 2016
	Color	26	C29r	Lower Red Garumnian	Dinosauria indet. Hadrosauridae indet. Bothremydidae indet.	Cruzado-Caballero et al., 2012 Puértolas-Pascual et al., 2012 Company et al., 2015 Puértolas-Pascual et al., 2018
	Dolor 1	28	C29r	Lower Red Garumnian	Hadrosauridae? indet.	Cruzado-Caballero et al., 2012 Puértolas-Pascual et al., 2012 Puértolas-Pascual et al., 2018
	Dolor 2	29	C29r	Lower Red Garumnian	Dinosauria indet. Avialae indet. Bothremydidae indet.	Cruzado-Caballero et al., 2012 Puértolas-Pascual et al., 2012 Puértolas-Pascual et al., 2018
	Dolor 3	30	C29r	Lower Red Garumnian	Hadrosauridae indet. Ornithuromorpha indet. Bothremydidae indet. Allodaposuchidae indet.	Cruzado-Caballero et al., 2012 Puértolas-Pascual et al., 2012 Company et al., 2015 Puértolas-Pascual et al., 2018 Blanco et al., 2020 Pérez-Pueyo et al., in press
	Elías	55	C30n-C29r	Lower Red Garumnian	Arenysuchus gascabadiolorum	Puértolas et al., 2011
	Femur	16	C29r	Grey Garumnian	Sauropoda	Canudo, 2001 Vila et al., 2012 Puértolas et al., 2018	Denominated 'Serraduy' in Vila et al., 2012
	Fornons 1	37	C29r	Grey Garumnian	Dinosauria indet. Hadrosauridae indet	Puértolas-Pascual et al., 2018
	Fornons 2	41	C29r	Grey Garumnian	Dinosauria indet. Hadrosauridae? indet.	Puértolas-Pascual et al., 2018
	Fornons 3	44	C29r	Lower Red Garumnian	Dinosauria indet. Theropoda? indet.	Cruzado-Caballero et al., 2012 Puértolas-Pascual et al., 2012 Puértolas-Pascual et al., 2018
	Fuente San Cristobal	15	C29r	Aren Fm	Dinosauria indet. Hadrosauridae indet.	Puértolas-Pascual et al., 2018
	Isclés 1	45	C29r	Lower Red Garumnian	Hadrosauropodus sp.	Vila et al., 2015
	Isclés 2	46	C29r	Lower Red Garumnian	Hadrosauropodus sp.	Vila et al., 2015
	Isclés 3	47	C29r	Lower Red Garumnian	Hadrosauropodus sp.	Vila et al., 2015
	Isclés 4	48	C29r	Lower Red Garumnian	Hadrosauropodus sp.	Vila et al., 2015
	Isclés 5	49	C29r	Lower Red Garumnian	Hadrosauropodus sp.	Vila et al., 2015
	Larra 1	6	C29r	Lower Red Garumnian	Eusuchia indet.	Puértolas-Pascual et al., 2016 Puértolas-Pascual et al., 2018
	Larra 2	7	C29r	Lower Red Garumnian	Dinosauria indet. Ornithopoda indet. Hadrosauridae indet. Bothremydidae indet. Allodaposuchidae indet.	Puértolas-Pascual et al., 2018
	Larra 3	3	C29r	Lower Red Garumnian	Dinosauria indet. Hadrosauridae indet. Eusuchia indet. Bothremydidae indet.	Puértolas-Pascual et al., 2016 Puértolas-Pascual et al., 2018
	Larra 4	4	C29r	Lower Red Garumnian	Hadrosauridae indet. Coelurosauria indet. Dromeosauridae indet. Bothremydidae indet. Allodaposuchidae indet. Discoglossidae indet. Actinistia indet.	Puértolas_Pascual et al., 2018 Pérez-Pueyo et al., 2019a
	Larra 5	5	C29r	Lower Red Garumnian	Hadrosauridae indet. Bothremydidae indet.	Puértolas-Pascual et al., 2018
	Larra 6	8	C29r	Lower Red Garumnian	Hadrosauridae indet. Bothremydidae indet.	Puértolas-Pascual et al., 2018
	Pedregal	12	C29r	Lower Red Garumnian	Hadrosauridae indet. Allodaposuchidae indet.	Puértolas-Pascual et al., 2018 Blanco et al., 2020
	Rin 1	9	C29r	Aren Fm	Dinosauria indet. Bothremydidae indet.	Puértolas-Pascual et al., 2018
	Rin 2	10	C29r	Aren Fm	Dinosauria indet. Bothremydidae indet.	Murelaga & Canudo, 2005 Puértolas-Pascual et al., 2019
	Serraduy Norte	27	C29r	Lower Red Garumnian	Characichnos cf. Crocodylopodus Hadrosauropodus sp.	Vila et al. 2013 Vila et al., 2015	Crocodylomorphs and hadrosauroids tracks may be situated in different stratigraphic levels
	Sierra del Sis 1	42	C29r	Grey Garumnian	Dinosauria indet. Hadrosauridae indet. Bothremydidae indet.	Puértolas-Pascual et al., 2018
	Sierra del Sis 2	43	C29r	Lower Red Garumnian	Dinosauria indet. Hadrosauridae indet.	Puértolas-Pascual et al., 2018
	Veracruz 1	40	C29r	Grey Garumnian	Osteichthyes indet. Hadrosauridae indet. Bothremydidae indet. Crocodylomorpha indet	Pérez-Pueyo et al. 2019b
